# Supplementary material
Source: MDPI journal article supplement (https://www.mdpi.com/search?q=forests-11-01087)
Supplement: s001 [file forests-11-01087-s001.pdf]

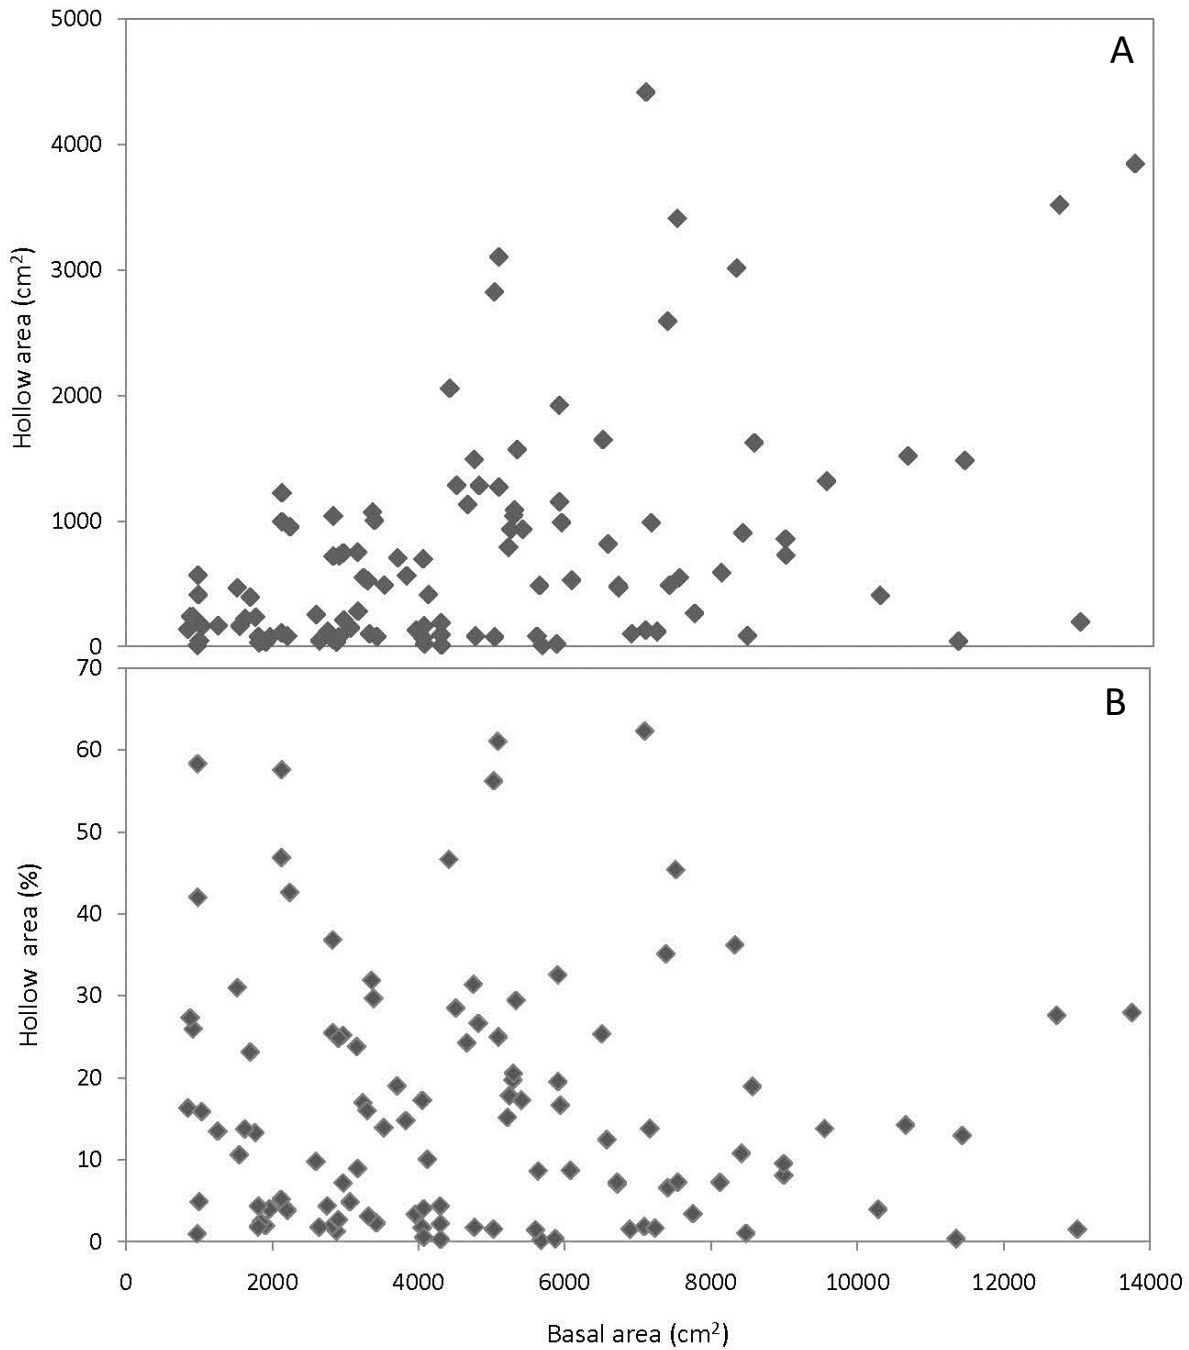

**Figure 1.** Variation in (A) stem hollow area and (B) percent hollow area by tree basal area for the four tree species with  $N \geq 20$  individuals sampled (*P. psilostachya*, *M. elata* ( $N = 30$ ), *M. bidentata* ( $N = 28$ ), and *A. lecointei* ( $N = 20$ )).

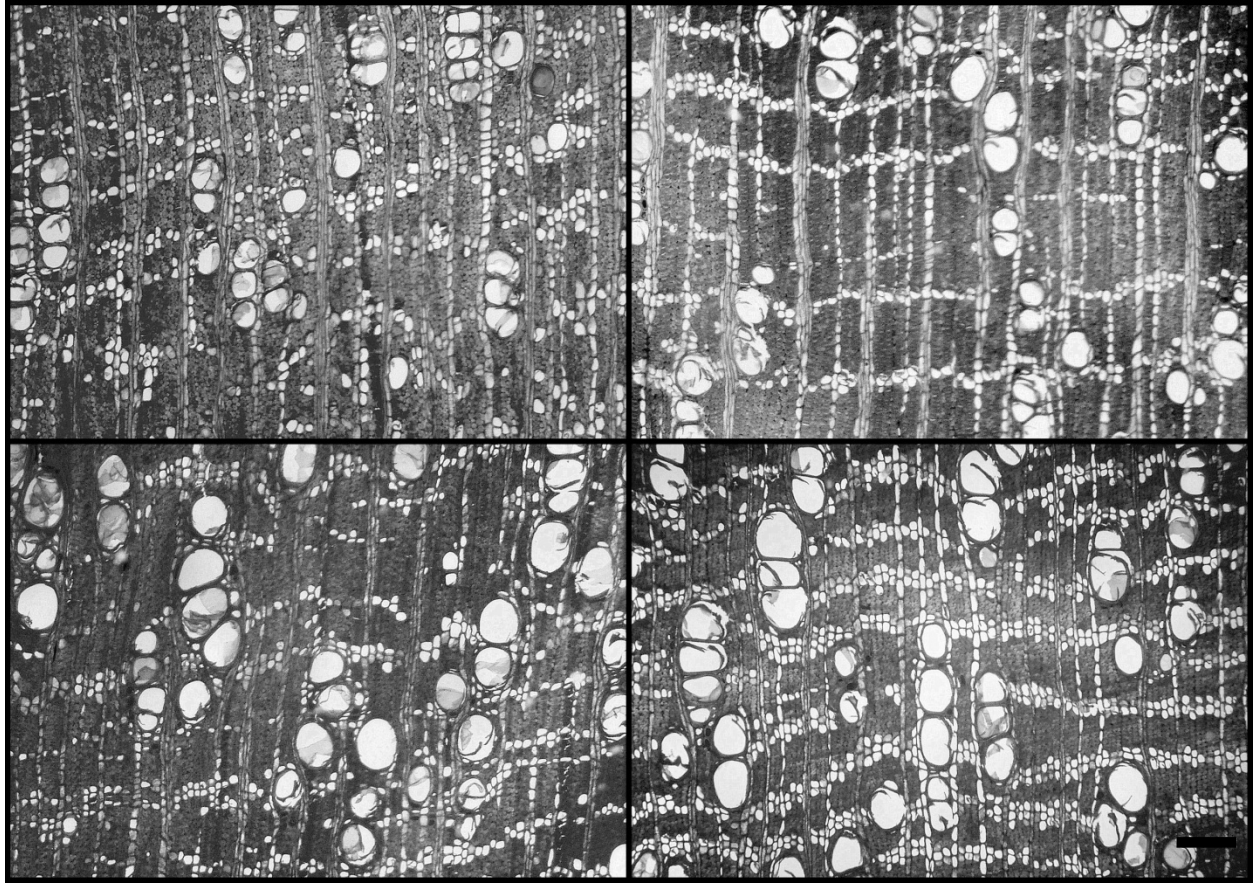

**Figure S2.** Wood anatomy of *Manilkara elata* (Sapotaceae). Scale bar = 200  $\mu\text{m}$ .

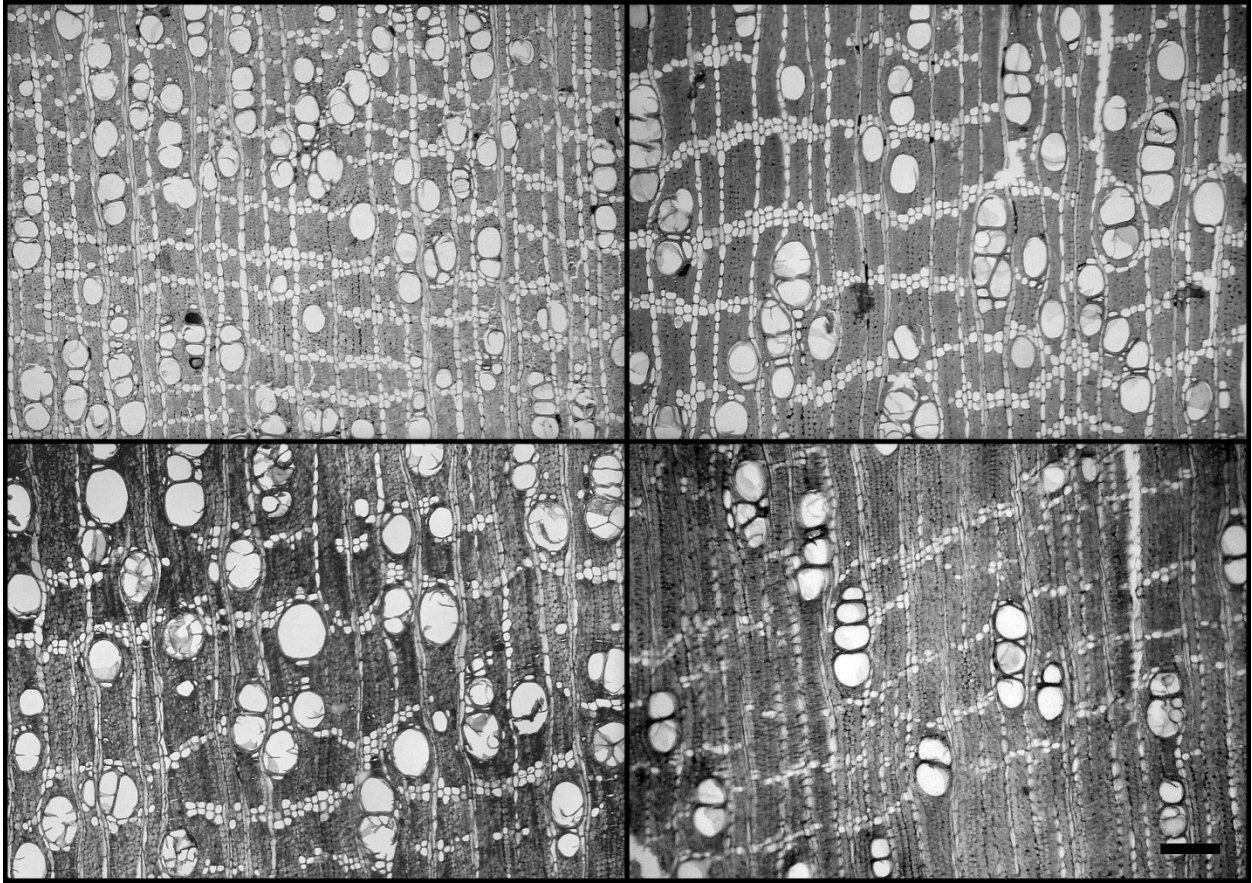

**Figure S3.** Wood anatomy of *Manilkara bidentata* (Sapotaceae). Scale bar = 200  $\mu\text{m}$ .

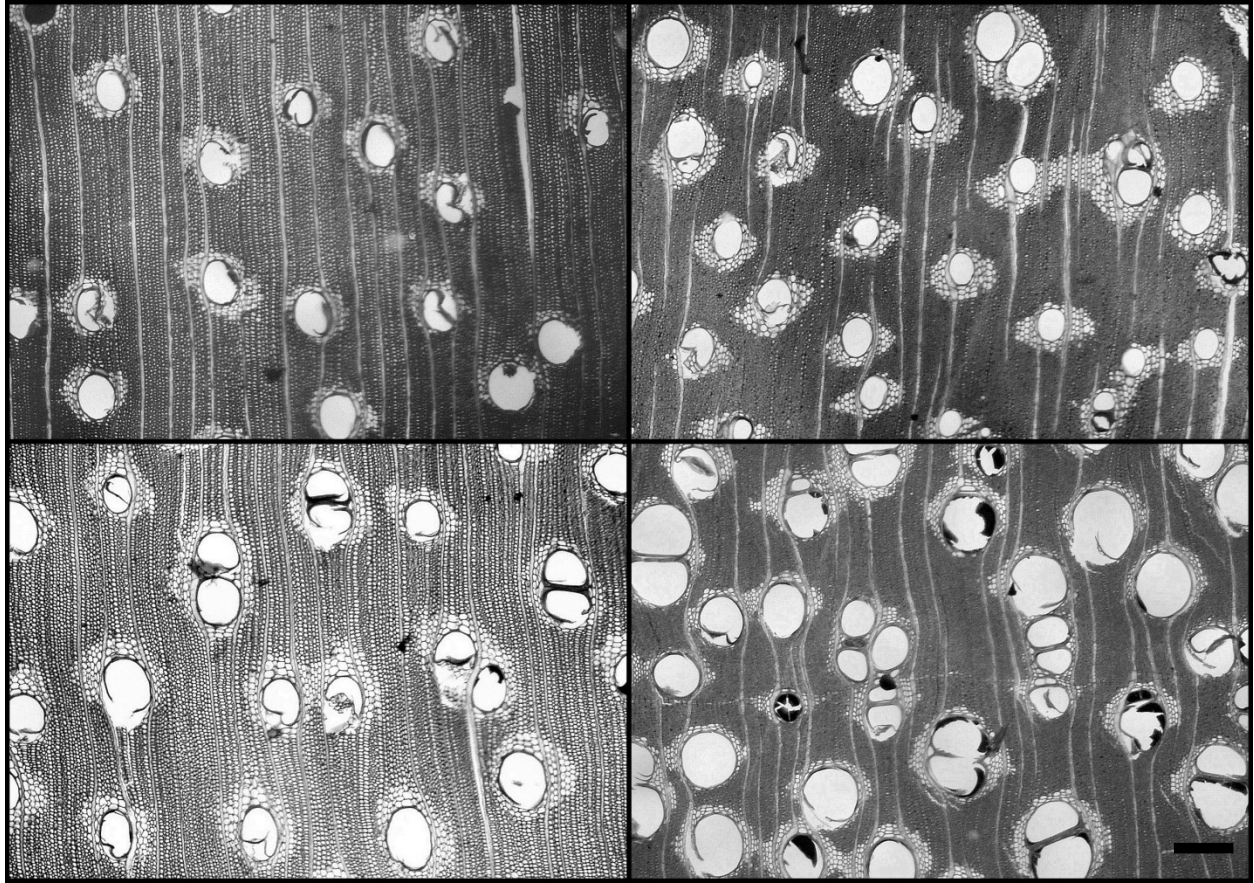

**Figure S4.** Wood anatomy of *Pseudopiptadenia psilostachya* (Fabaceae). Scale bar = 200  $\mu\text{m}$ .

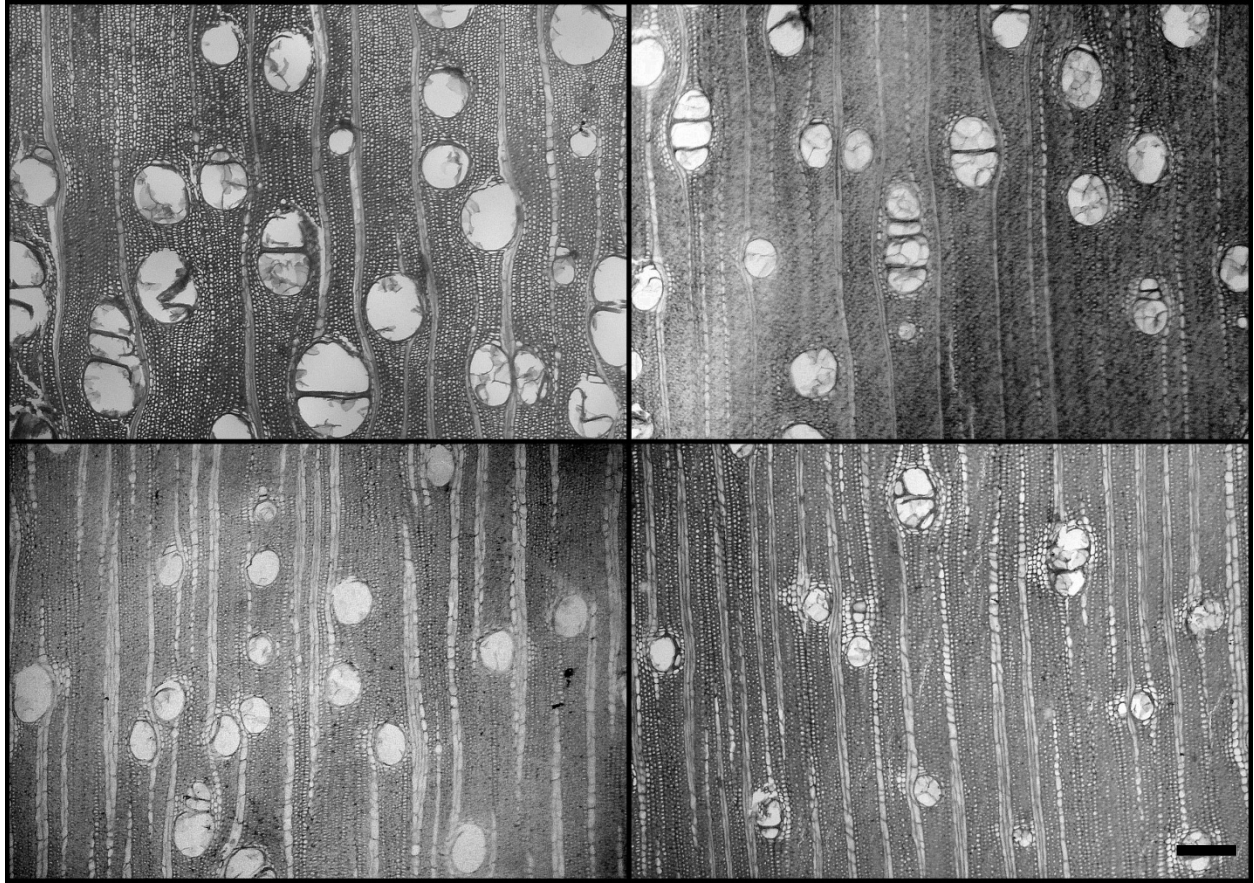

**Figure S5.** Wood anatomy of *Astronium lecointei* (Anacardiaceae). Scale bar = 200  $\mu\text{m}$ .



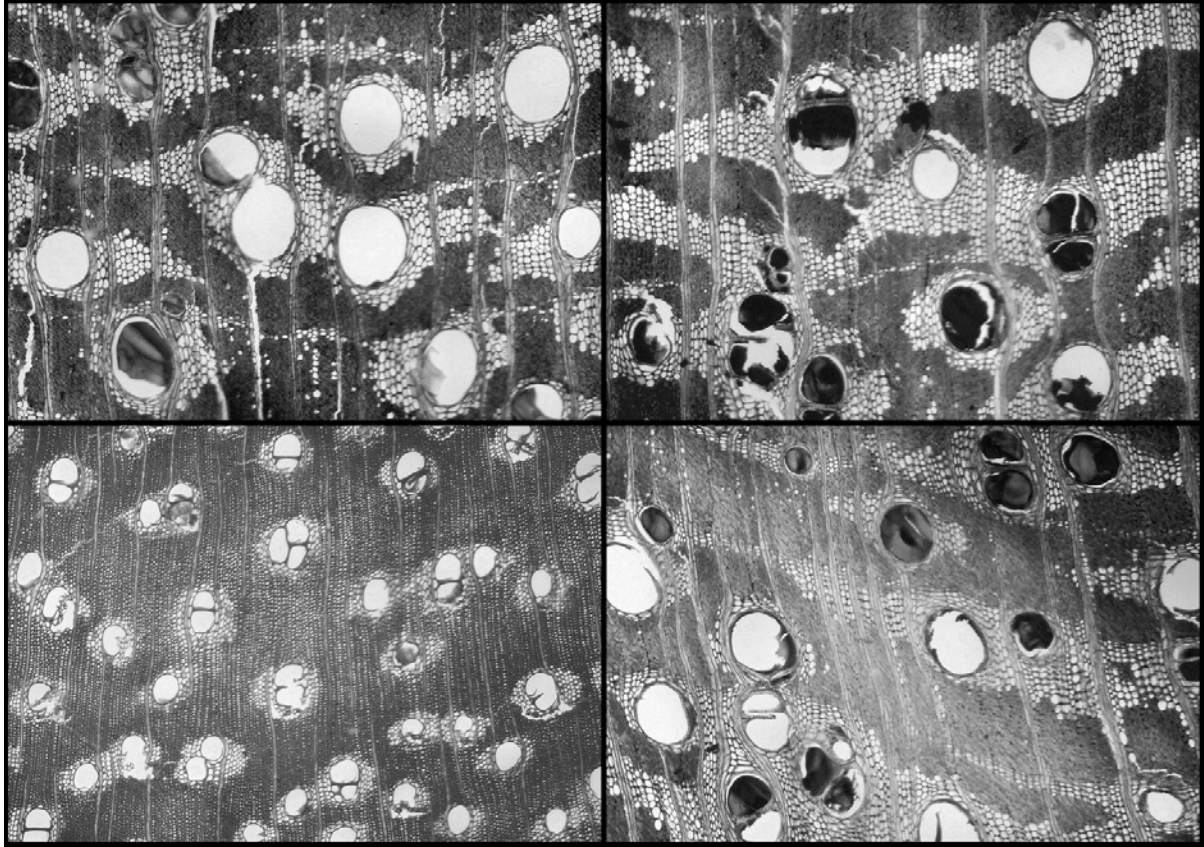

**Figure S6.** Wood anatomy of *Dinizia excelsa* (Mimosaceae). Scale bar = 200  $\mu\text{m}$ .

**Table S1.** Termite species sampled in heartwood hollows of the five studied tree species.

|                                         | <i>D.</i><br><i>excelsa</i> | <i>P.</i><br><i>psilostachya</i> | <i>M. elata</i> | <i>M. bidentata</i> | <i>A. lecointei</i> | Total |
|-----------------------------------------|-----------------------------|----------------------------------|-----------------|---------------------|---------------------|-------|
| <i>Anoplotermes</i> sp.                 | 1                           | 1                                | -               | -                   | -                   | 2     |
| <i>Armitermes</i> c.f. <i>holmgreni</i> | -                           | 1                                | -               | -                   | -                   | 1     |
| <i>Armitermes</i> sp.                   | -                           | -                                | -               | 1                   | -                   | 1     |
| <i>Convexitermes manni</i>              | -                           | -                                | -               | -                   | 1                   | 1     |
| <i>Coptotermes testaceus</i>            | 3                           | 8                                | 17              | 6                   | 5                   | 39    |
| <i>Heterotermes</i> sp.                 | -                           | 1                                | -               | -                   | -                   | 1     |
| <i>Nasutitermes guayanae</i>            | -                           | -                                | 1               | -                   | -                   | 1     |
| <i>N. surinamensis</i>                  | -                           | -                                | 1               | -                   | -                   | 1     |
| <i>Ruptitermes</i> sp.                  | 1                           | -                                | -               | -                   | -                   | 1     |
| Termitinae                              | -                           | -                                | 1               | -                   | 1                   | 2     |
| Number of trees sampled                 | 8                           | 30                               | 30              | 28                  | 20                  | 116   |
| Number of trees with termites           | 5                           | 11                               | 20              | 7                   | 6                   | 50    |
